# Supplementary material for: Retracted Article: Polycaprolactone composites with TiO 2 for potential nanobiomaterials: tunable properties using different phases
Source: Royal Society of Chemistry journal article supplement (doi:10.1039/c2cp41789h), 2012-01-01
Supplement: c2cp41789h.pdf [file c2cp41789h.pdf]

**Supplementary Figure**

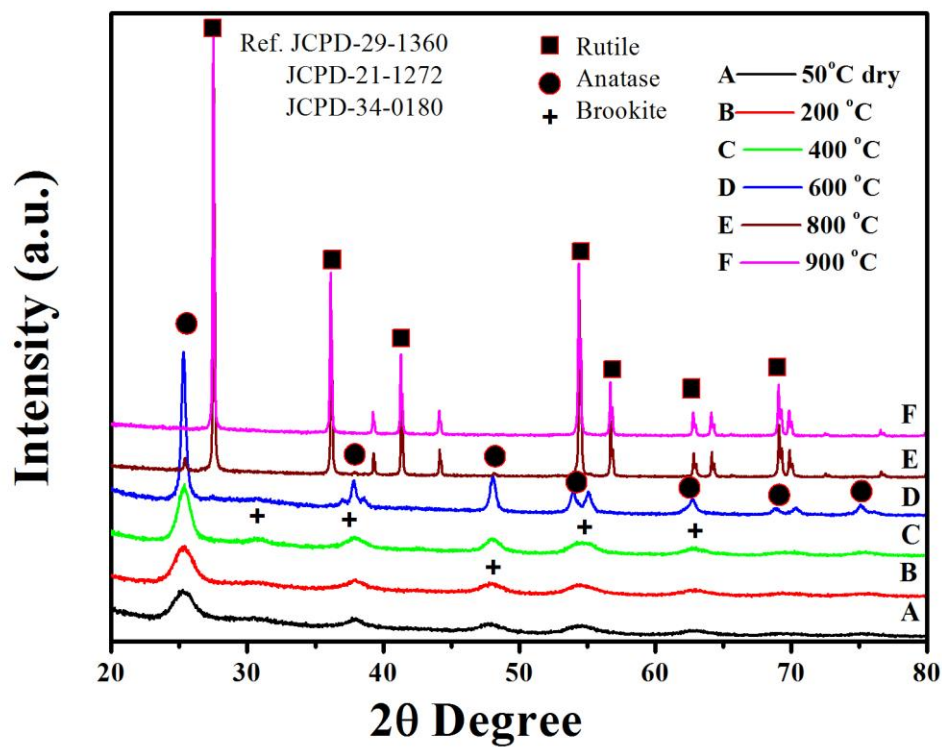

**Figure S1:** XRD of Sol-gel synthesised TiO<sub>2</sub> Nanoparticles, heated for 2hr at respective temperature.  
(600°C-Pure anatase phase, 900°C-pure rutile phase)

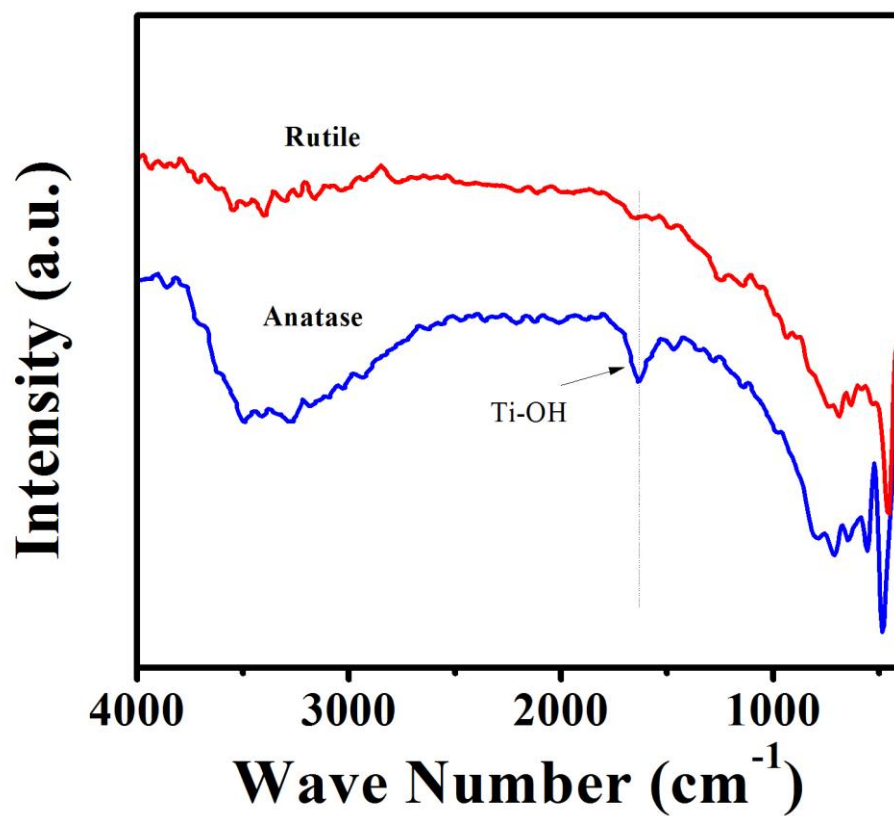

**Figure S2:** FTIR spectrum of Sol-gel synthesised anatase, rutile TiO<sub>2</sub> Nanoparticles,

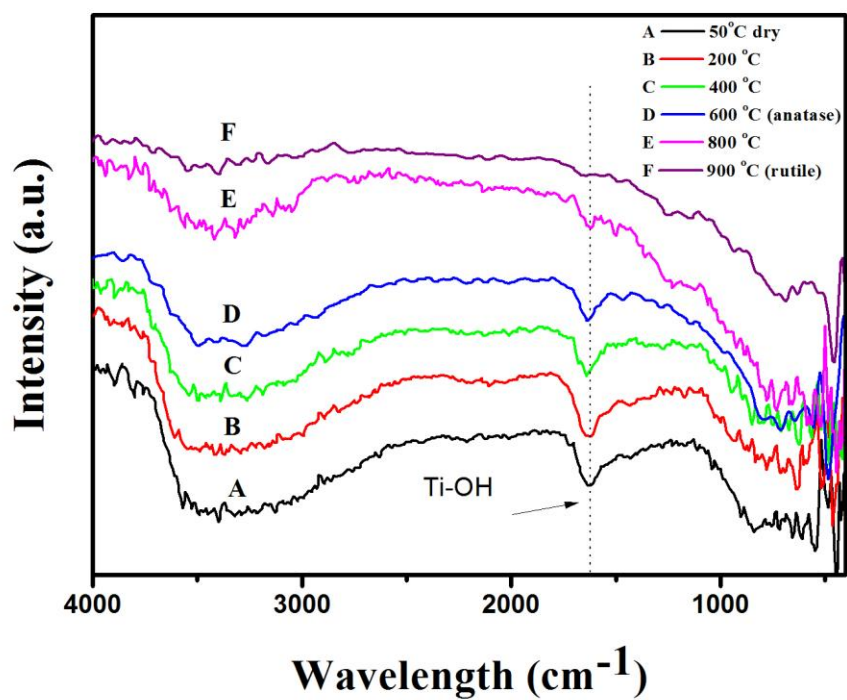

**Figure S3:** FTIR spectrum of Sol-gel synthesised TiO<sub>2</sub> Nanoparticles with different calcinations temperature,

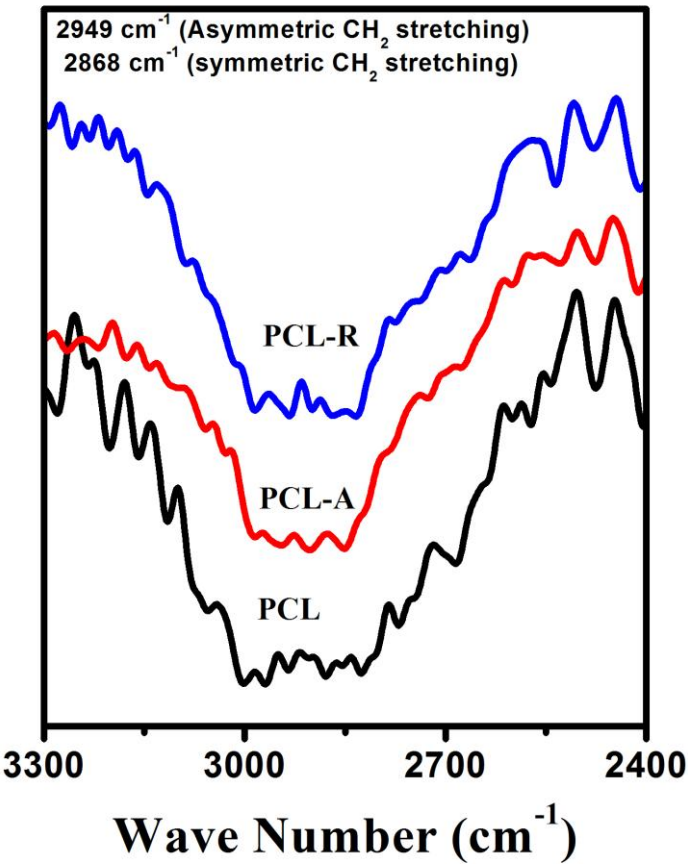

**Figure S4:** FTIR Spectroscopy of PCL, PCL-A and PCL-R NFs Composites

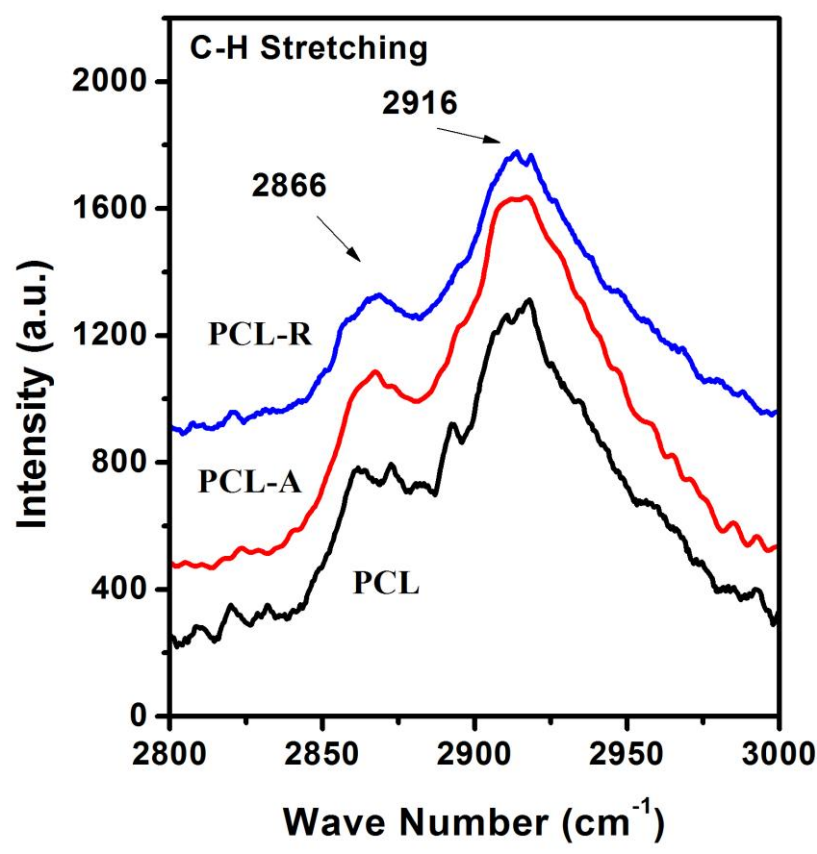

**Figure S5:** Raman Spectroscopy of PCL, PCL-A and PCL-R NFs Composites

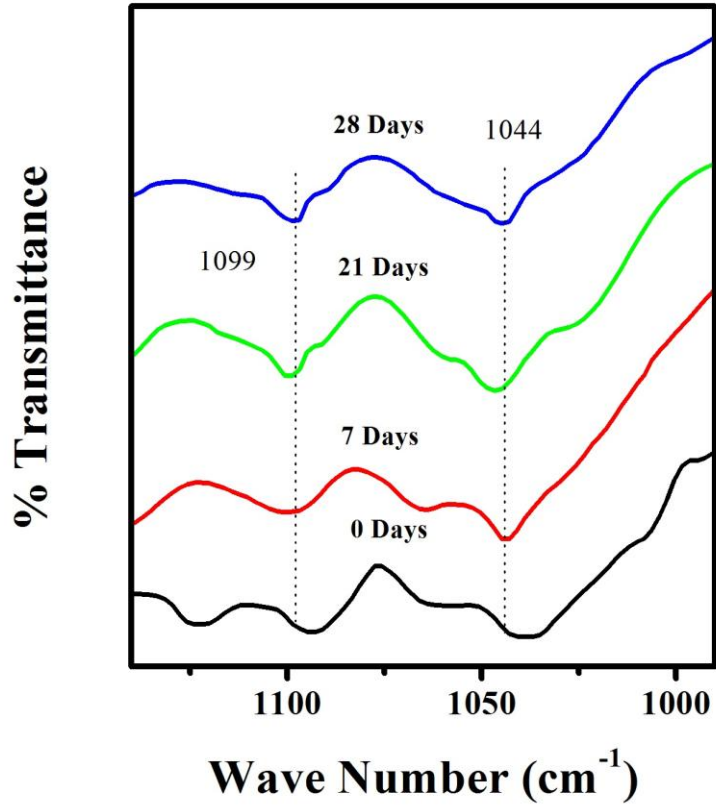

**Figure S6:** FTIR spectra of SBF-incubated PCL-R composites NFs as a function of time

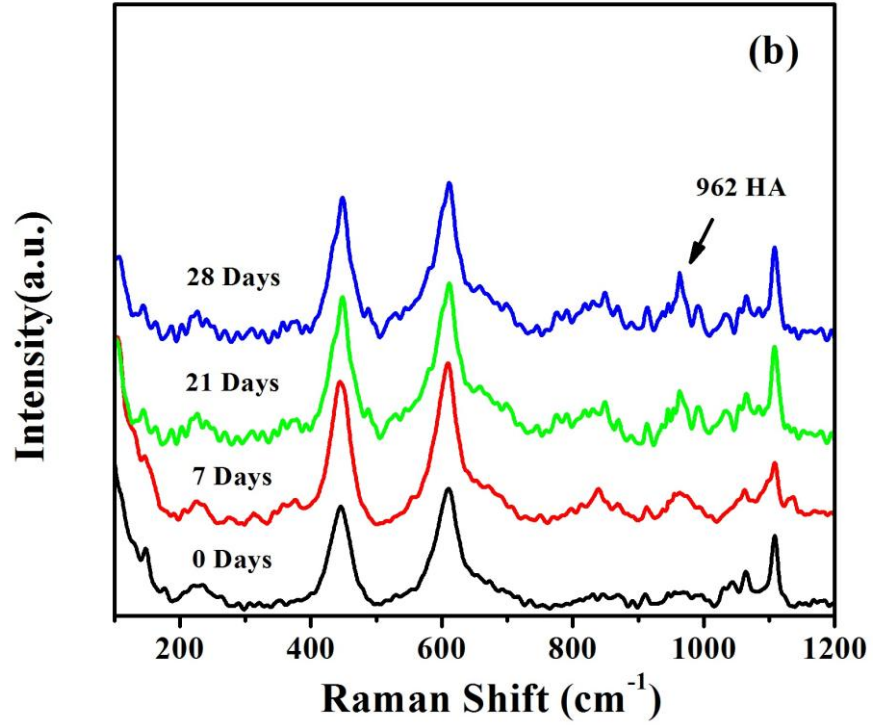

**Figure S7:** Raman spectra of SBF-incubated PCL-R composites NFs as a function of time

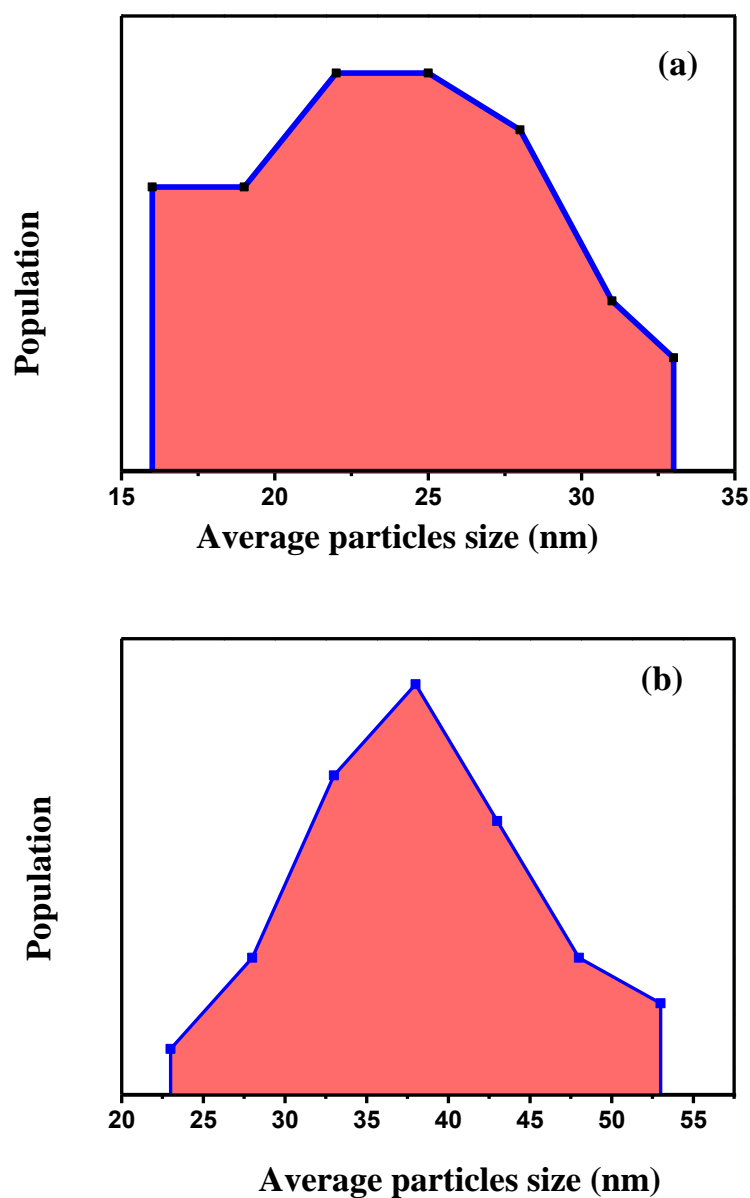

**Figure S8:** Average particles size distribution using TEM micrographs of TiO<sub>2</sub> Nanoparticles (a) Anatase (b) Rutile phase.



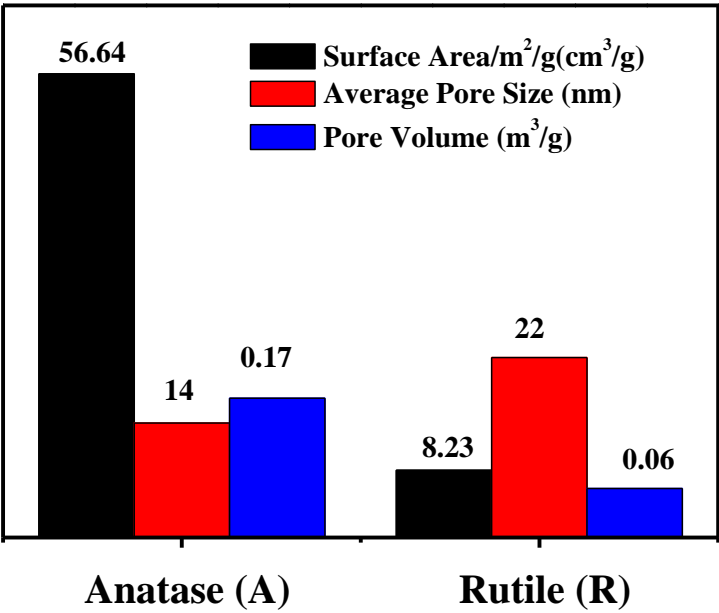

**Figure S9:** BET analysis of the two phase nanoparticles.

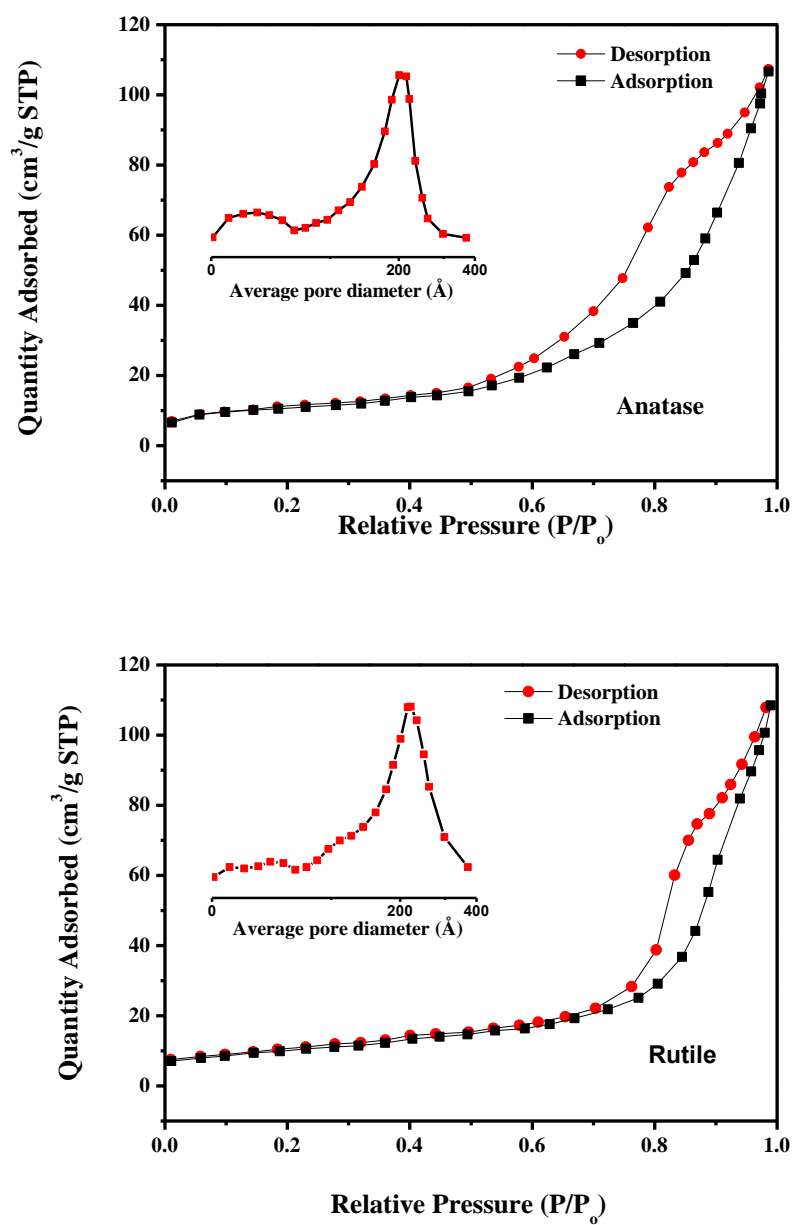

**Figure S10:** BET adsorption isotherm analysis of the two phase nanoparticles, inset shows pore size distribution,

**Table S1:** BET Surface area analyses of the nanoparticles with respect to calcinations temperature.

| Sample Name     | (BET)<br>Surface Area (m <sup>2</sup> /g) | Single point Adsorption total<br>Pore Volume (cm <sup>3</sup> /g) | (BET)Average<br>Pore width<br>(nm) |
|-----------------|-------------------------------------------|-------------------------------------------------------------------|------------------------------------|
| 50°C dry        | 198.9529                                  | 0.260953                                                          | 4.68                               |
| 200°C           | 192.9408                                  | 0.250389                                                          | 5.19                               |
| 400°C           | 114.9382                                  | 0.240613                                                          | 8.37                               |
| 600°C (anatase) | 56.6461                                   | 0.165878                                                          | 14.12                              |
| 800°C           | 10.1756                                   | 0.091800                                                          | 20.69                              |
| 900 °C (rutile) | 8.2351                                    | 0.057281                                                          | 21.87                              |

**Table S2:** Contact angle of PCL and PCL-TiO<sub>2</sub> nanofibres composite

| Contact angle |       |       |       |       |       |       |       |       |       |       |       |       |       |       | Mean  | sd(Er±) |         |
|---------------|-------|-------|-------|-------|-------|-------|-------|-------|-------|-------|-------|-------|-------|-------|-------|---------|---------|
| PCL-A         | 98.8  | 99.4  | 99.5  | 101.4 | 101.2 | 100.5 | 102.5 | 102.4 | 99.6  | 99.8  | 100.3 | 102.3 | 101.5 | 102.9 | 99.2  | 100.75  | 1.3648  |
| PCL-R         | 107.8 | 104.6 | 105.3 | 107.4 | 107.8 | 105.6 | 104.5 | 106.4 | 105.7 | 106.4 | 107.1 | 108.2 | 104.7 | 106.2 | 106.8 | 106.3   | 1.21831 |
| PCL           | 116.9 | 116.7 | 118.3 | 119.1 | 117.4 | 118.2 | 116.3 | 120.9 | 117.3 | 117.2 | 119.9 | 116.9 | 119.6 | 117.4 | 118.1 | 118.02  | 1.33106 |

**Table S3:** Details of Modulus and Toughness of nanofibres

|         | Modulus | Standard<br>Deviation | Toughness | Standard<br>Deviation |
|---------|---------|-----------------------|-----------|-----------------------|
| PCL     | 4.28    |                       | 325       |                       |
|         | 3.98    |                       | 347       |                       |
|         | 4.62    |                       | 307       |                       |
| Average | 4.29    | 0.32                  | 326       | 20.03                 |
| PCL-A   | 5.13    |                       | 478       |                       |
|         | 5.43    |                       | 502       |                       |
|         | 4.81    |                       | 444       |                       |
| Average | 5.12    | 0.31                  | 474       | 29.14                 |
| PCL-R   | 4.79    |                       | 358       |                       |
|         | 4.42    |                       | 378       |                       |
|         | 5.02    |                       | 339       |                       |
| Average | 4.74    | 0.30                  | 358       | 19.50                 |
